# Supplementary material for: Regeneration in sponge Sycon ciliatum partly mimics postlarval development
Source: Oxford University Press journal article supplement (doi:10.1242/dev.193714), 2020-01-01
Supplement: dev193714supp.pdf [file dev193714supp.pdf]

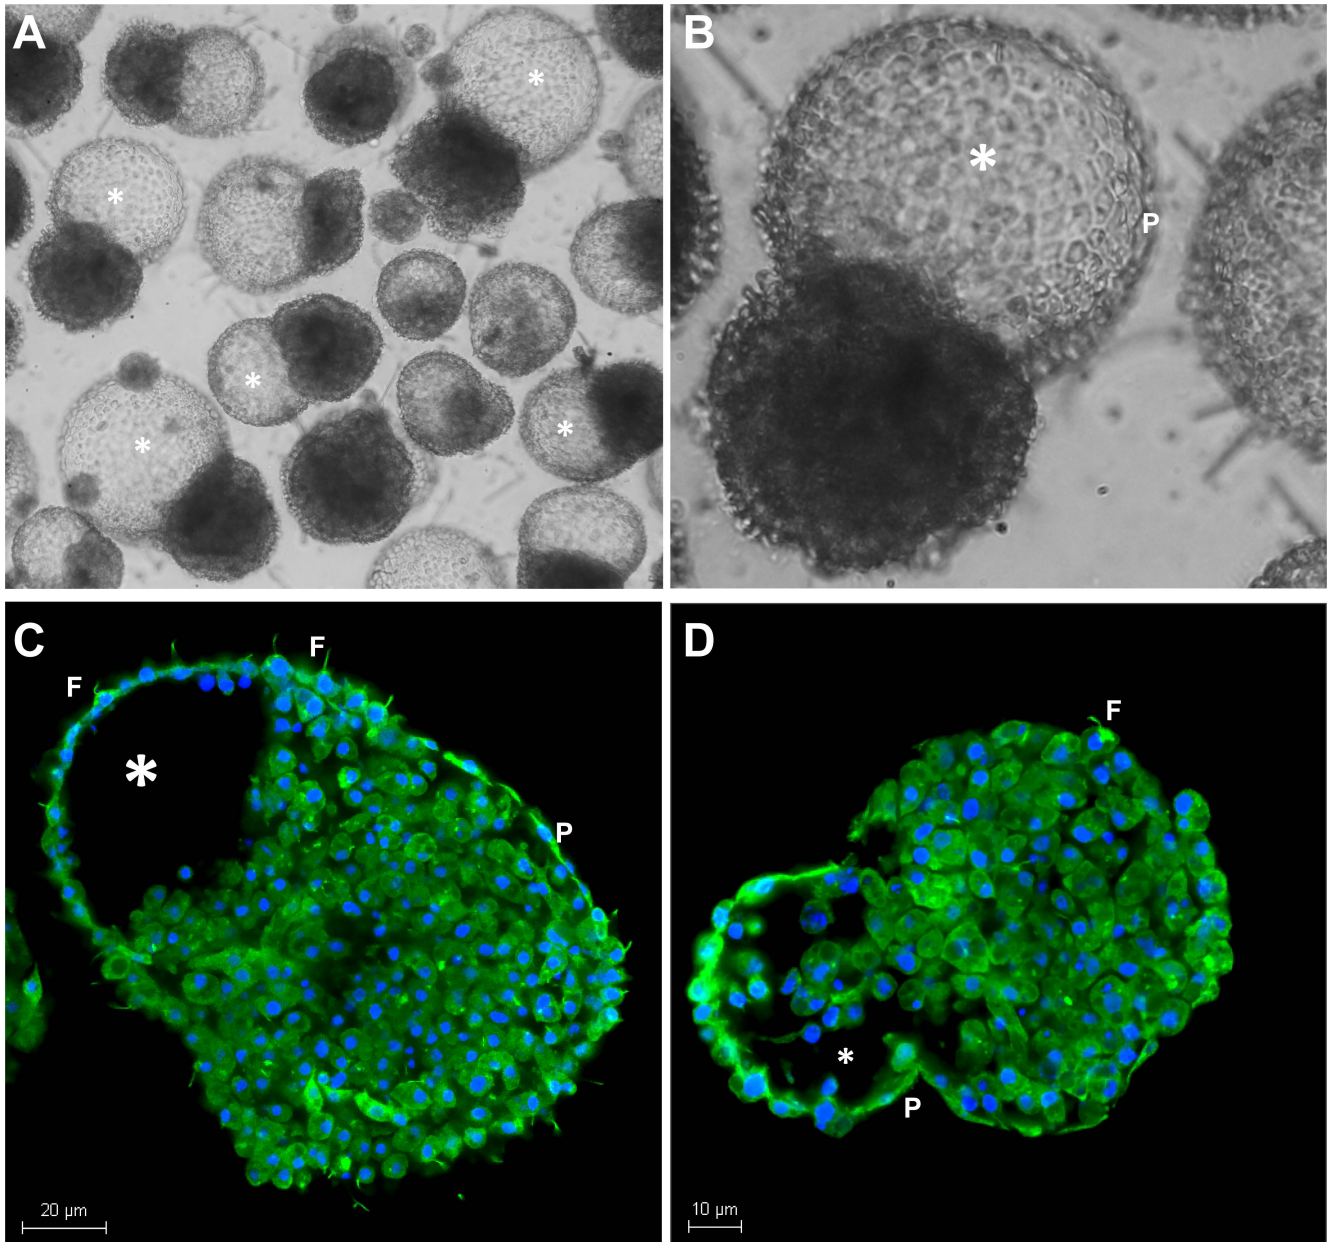

**Fig. S1: Morphological of the second kind of primmorphs stage.** (A&B) A general view of primmorphs in the culture after 2 dpd, an intact single layer of cells surrounding primmorphs and inner cell mass, the external cavity (\*) resembles the extraembryonic cavity with a single layer of flat cells. (C&D). Images are taken with (A & B) bright field, (C) confocal, Anti- $\alpha$ -Tubulin (green) with the nuclei counterstained with DAPI (blue). P: pinacocyte; F: flagella; (\*): external cavity.

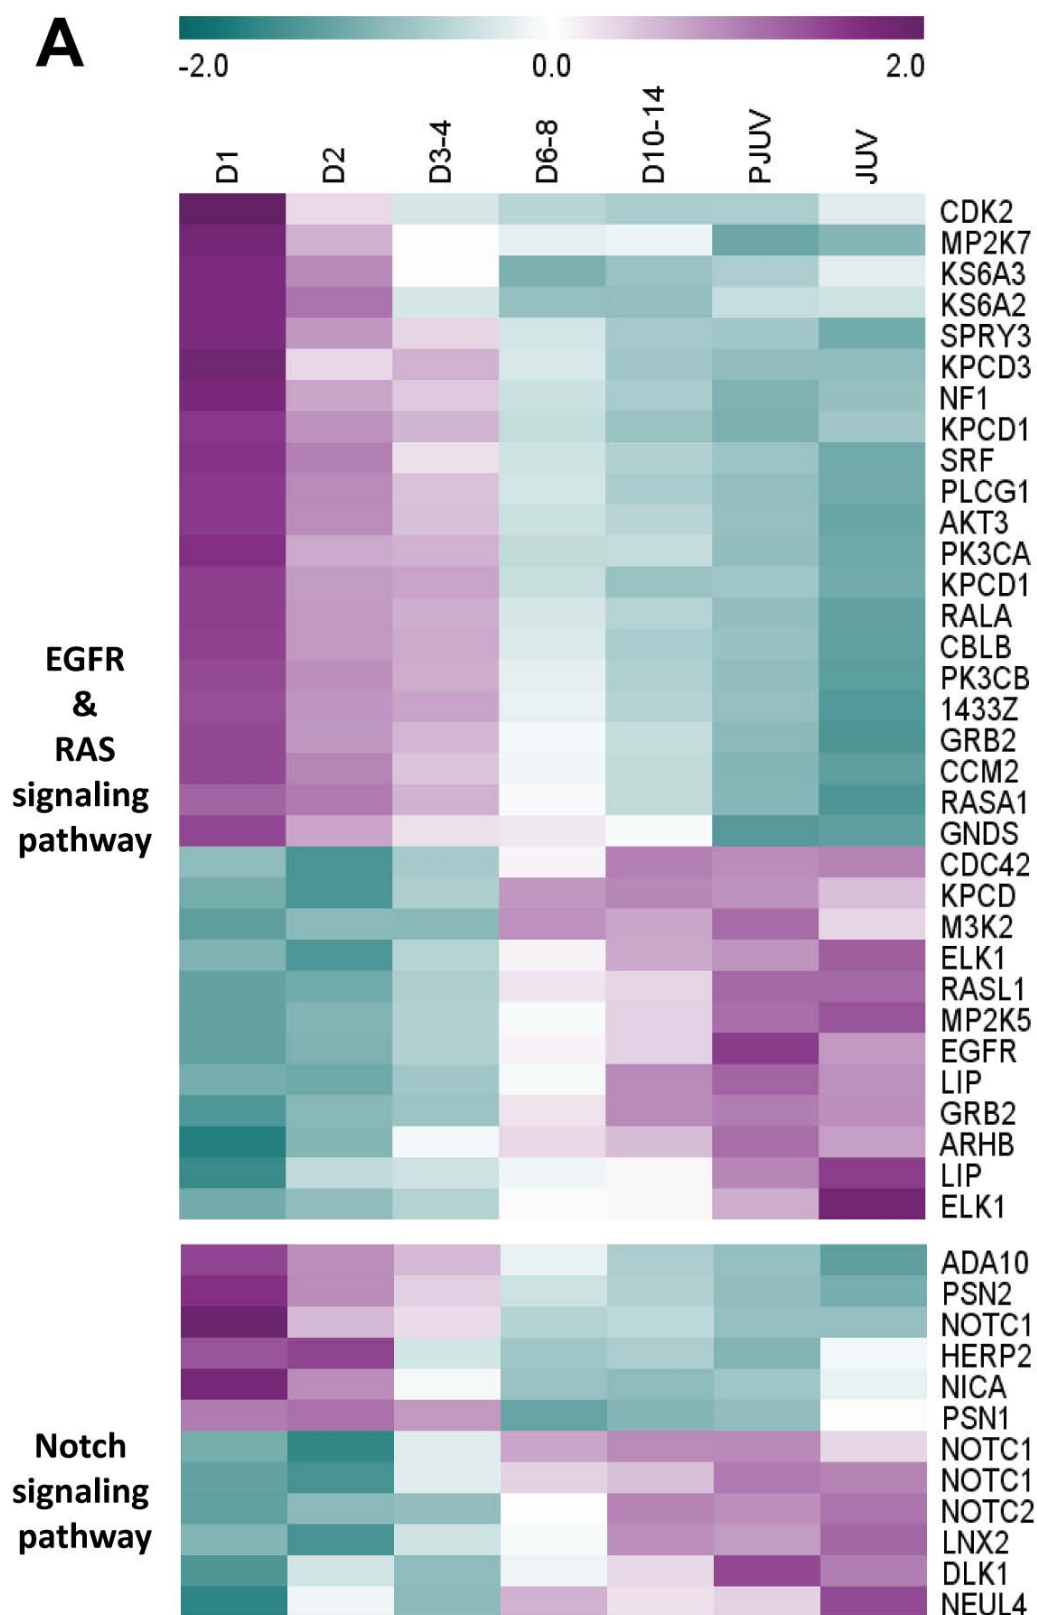

**Fig. S2: Differentially expressed genes associated with developmental signaling pathways.** (A) Heatmap shows the relative expression of developmental regulatory genes associated with EGF, Notch, and Ras signaling pathways. The selected list of genes is significantly DE across the course of *S. ciliatum* regeneration.

| Stage                                                                   | Regeneration                                                                        | Morphological signatures                                                                                                                                                                                           | Postlarval development                                                                               | Overlap |
|-------------------------------------------------------------------------|-------------------------------------------------------------------------------------|--------------------------------------------------------------------------------------------------------------------------------------------------------------------------------------------------------------------|------------------------------------------------------------------------------------------------------|---------|
| I) Aggregation<br>dpd 1<br>$N = \sim 20, n = 6, R = 2$                  | 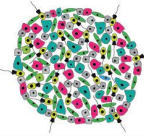   |                                                                                                                                                                                                                    | SL<br>            | —       |
| II) Primmorphs<br>dpd 2<br>$N = \sim 20, n = 6, R = 2$                  |    | <ul style="list-style-type: none"> <li>• Epithelized surface with pinocytes and loss of granulated inner cell mass.</li> <li>• A continuous cavity separating external pinacocytes and inner cell mass.</li> </ul> | S1<br>            | —       |
| III) Primmorphs with spicules<br>dpd 3-4<br>$N = \sim 20, n = 3, R = 6$ |    | <ul style="list-style-type: none"> <li>• First appearance of spicules</li> </ul>                                                                                                                                   | S2<br>            | *       |
| IV) Ciliated chamber<br>dpd 6-8<br>$N = \sim 20, n = 3, R = 5$          |    | <ul style="list-style-type: none"> <li>• Developing multiple ciliated chambers</li> </ul>                                                                                                                          | S3<br>            | *       |
| V) Choanoderm<br>dpd 10-14<br>$N = \sim 20, n = 3, R = 4$               |   | <ul style="list-style-type: none"> <li>• Choanoderm with flagellated choanocytes</li> <li>• Expanding spongocoel</li> <li>• A continuous pinacoderm</li> </ul>                                                     | S4 juvenile<br>  | *       |
| VI) Pre-Juvenile<br>dpd 16-18<br>$N = \sim 20, n = 3, R = 3$            |  | <ul style="list-style-type: none"> <li>• Osculum opens at the apical end</li> <li>• Porocytes form ostia</li> </ul>                                                                                                | S5 juvenile<br> | *       |
| VII) Juvenile<br>dpd 21-24<br>$N = \sim 20, n = 3, R = 2$               |  | <ul style="list-style-type: none"> <li>• Increase in the size of ascon</li> <li>• Increase in number of porocytes</li> </ul>                                                                                       | YS<br>          | *       |

**Table S1: Summary of the morphological and cellular events during regeneration in *S. ciliatum*.**

The table details various regeneration steps and their overlaps with postlarval development. 4th column (postlarval development) depicts the morphological events at postlarval development of *S. ciliatum*. 1st column details number of samples collected for RNA-sequencing at each stage of regeneration, N=number of pooled regenerating structures per well, n=number of pooled regenerating structures per replicate, R=number of replicates per stage.

**Table S2: Data relevant to figure 5 detailing the differential gene expression data**

[Click here to Download Table S2](#)

**Table S3: Detailed clusters of regeneration and PLD, the data is related to figure 6**

[Click here to Download Table S3](#)

**Table S4: Data presented in the heatmaps**

[Click here to Download Table S4](#)

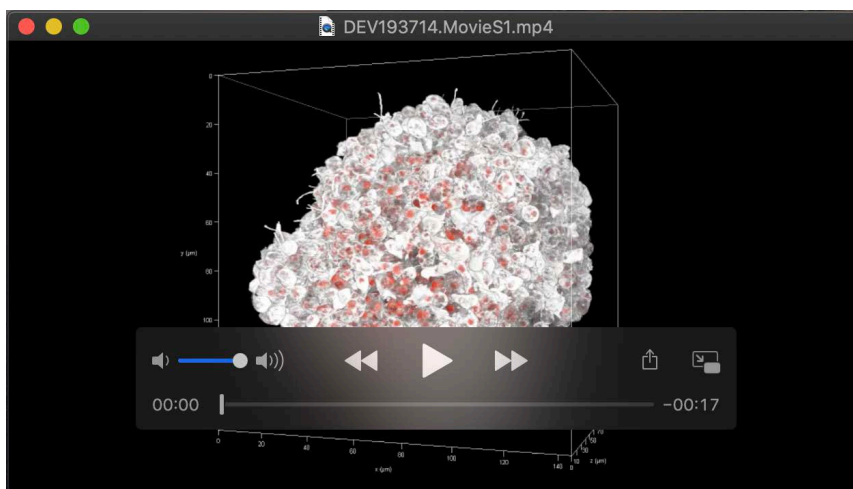

**Movie 1: 3D and Z-stack of imaging of primmorphs after 24 hrs post dissociation.**

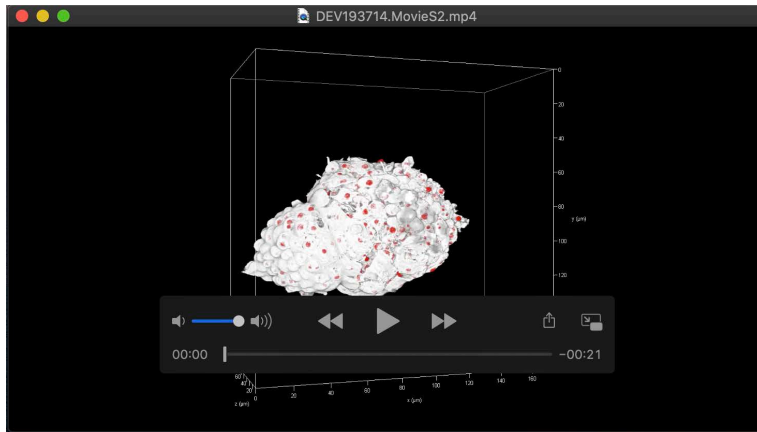

**Movie 2: 3D and Z-stack of imaging of primmorphs 2 days post dissociation.**

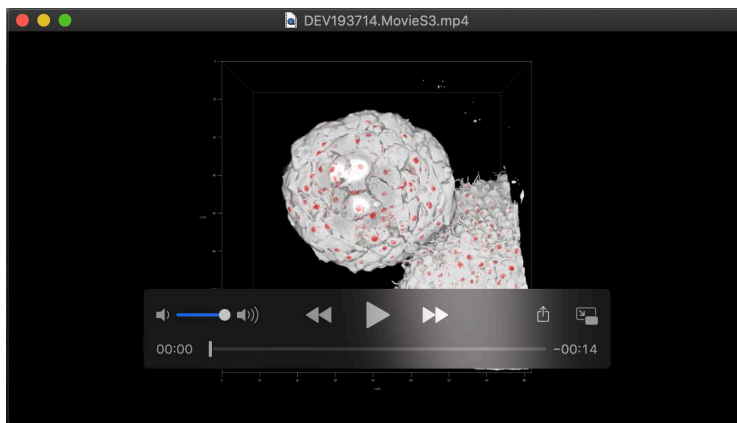

**Movie 3: 3D and Z-stack of imaging of primmorphs 3 days post dissociation.**

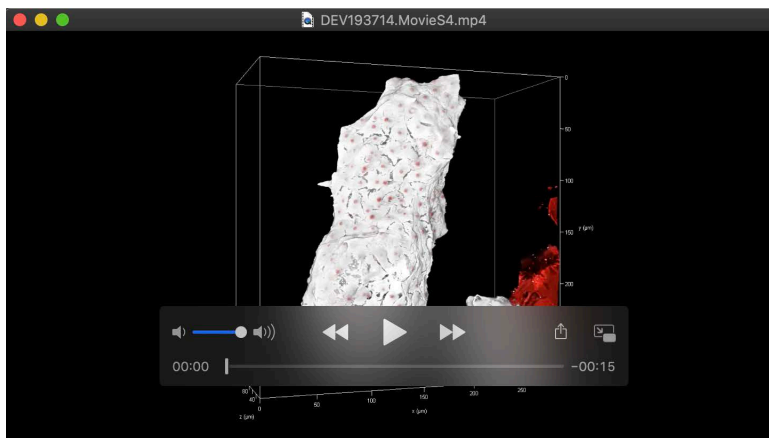

**Movie 4: 3D and Z-stack of imaging of structures with ciliated chambers 8 days post dissociation.**



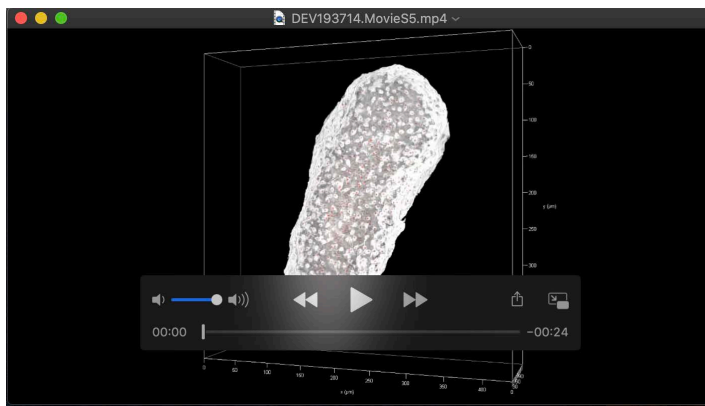

**Movie 5: 3D and Z-stack of imaging of regenerating structure at 12 days post dissociation.** Defined choanoderm with a single layer of choanocytes surrounding the atrium. Note that ostium and osculum are not formed yet.

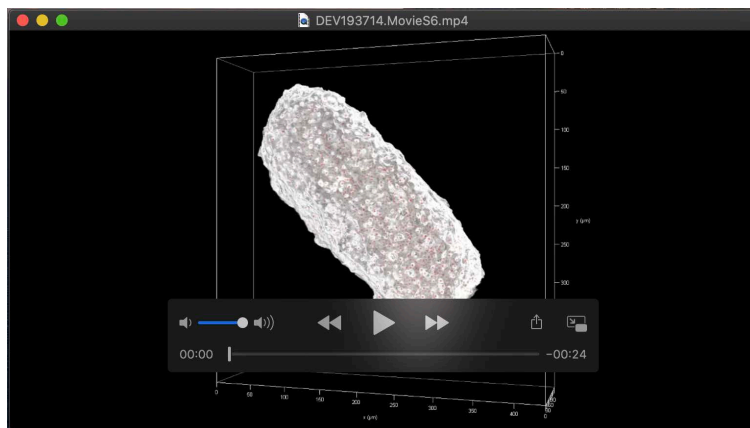

**Movie 6: 3D and Z-stack of imaging of pre-juvenile 18 days post dissociation.** The ostium and osculum are formed.

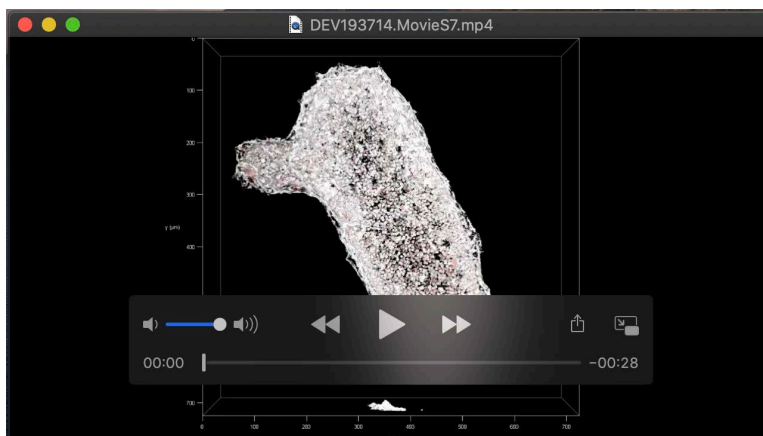

**Movie 7: 3D and Z-stack of imaging of juvenile 24 days post dissociation.**
